# Supplementary material for: Piezoelectric catalytic performance of BaTiO3 for sulfamethoxazole degradation
Source: Royal Society of Chemistry journal article supplement (doi:10.1039/d2ew00314g), 2022-01-01
Supplement: d2ew00314g1.pdf [file d2ew00314g1.pdf]

## Supporting Information for

# Piezoelectric Catalytic Performance of BaTiO<sub>3</sub> for Sulfamethoxazole

## Degradation

Yanning Lv, Minghao Sui\*, Xinyuan Lv, and Jingni Xie

State Key Laboratory of Pollution Control and Resource Reuse, Shanghai Institute of Pollution Control and Ecological Security, School of Environmental Science and Engineering, Tongji University, Shanghai 200092, People's Republic of China

\* Corresponding author: Email: minghaosui@tongji.edu.cn, Tel: +86-21-65982691, Fax: +86-21-6598631

Submitted to

### Environmental Science Water Research & Technology

#### Summary:

Table S1: Parameters during the optimization of BTO;

Table S2: Corresponding experimental conditions and performance of BTO samples during the optimization by orthogonal design;

Table S3: Variance analysis;

Table S4: Mean response analysis;

Figure S1: Zeta potential of BTO nanoparticles as a function of pH;

Figure S2: XRD patterns (the inserted lines correspond to the JCPDS data of No. 05-0626) of BTO nanoparticles after recycling experiments.

Figure S3: The leached concentration of Ti<sup>4+</sup> ions (a) and Ba<sup>2+</sup> ions (b) during the piezoelectric catalytic degradation of SMX;

Figure S4: Effect of initial concentration of Cl<sup>-</sup> (a), initial concentration of NO<sub>3</sub><sup>-</sup> (b), initial concentration of Ca<sup>2+</sup> (c), and initial concentration of Mg<sup>2+</sup> (d) on the piezoelectric catalytic degradation of SMX as a function of reaction time;

**Table S1.** Parameters during the optimization of BTO.

| Factors | A Ba/Ti | B [NaOH] (M) | C T (°C) | D T (h) | E EtOH (%) |
|---------|---------|--------------|----------|---------|------------|
| 1       | 0.5:1   | 0            | 120      | 4       | 0          |
| 2       | 1:1     | 0.25         | 140      | 8       | 25         |
| 3       | 1.5:1   | 0.5          | 160      | 12      | 50         |
| 4       | 2:1     | 0.75         | 180      | 20      | 75         |
| 5       | 2.5:1   | 1            | 200      | 24      | 100        |

**Table S2.** Corresponding experimental conditions and performance of BTO samples during the optimization by orthogonal design.

| BTO-number | Ba/Ti | [NaOH] (M) | T (°C) | t (h) | EtOH (%) | Empty column | *Performance (%) |
|------------|-------|------------|--------|-------|----------|--------------|------------------|
| BTO-1      | 0.5/1 | 0          | 120    | 4     | 0        | 1            | 66.1             |
| BTO-2      | 1     | 1          | 120    | 8     | 50       | 4            | 83.9             |
| BTO-3      | 1.5/1 | 0.75       | 120    | 12    | 100      | 2            | 86.5             |
| BTO-4      | 2     | 0.5        | 120    | 20    | 25       | 5            | 84.6             |
| BTO-5      | 2.5/1 | 0.25       | 120    | 24    | 75       | 3            | 82.3             |
| BTO-6      | 2.5/1 | 0.5        | 140    | 4     | 100      | 4            | 56.2             |
| BTO-7      | 0.5/1 | 0.25       | 140    | 8     | 25       | 2            | 66.1             |
| BTO-8      | 1     | 0          | 140    | 12    | 75       | 5            | 59.2             |
| BTO-9      | 1.5/1 | 1          | 140    | 20    | 0        | 3            | 61.7             |
| BTO-10     | 2     | 0.75       | 140    | 24    | 50       | 1            | 68.2             |
| BTO-11     | 2     | 1          | 160    | 4     | 75       | 2            | 55.0             |
| BTO-12     | 2.5/1 | 0.75       | 160    | 8     | 0        | 5            | 79.7             |
| BTO-13     | 0.5/1 | 0.5        | 160    | 12    | 50       | 3            | 82.9             |
| BTO-14     | 1     | 0.25       | 160    | 20    | 100      | 1            | 67.4             |
| BTO-15     | 1.5/1 | 0          | 160    | 24    | 25       | 4            | 73.0             |
| BTO-16     | 1.5/1 | 0.25       | 180    | 4     | 50       | 5            | 63.6             |
| BTO-17     | 2     | 0          | 180    | 8     | 100      | 3            | 70.1             |
| BTO-18     | 2.5/1 | 1          | 180    | 12    | 25       | 1            | 73.2             |
| BTO-19     | 0.5/1 | 0.75       | 180    | 20    | 75       | 4            | 73.6             |
| BTO-20     | 1     | 0.5        | 180    | 24    | 0        | 2            | 75.5             |
| BTO-21     | 1     | 0.75       | 200    | 4     | 25       | 3            | 63.2             |
| BTO-22     | 1.5/1 | 0.5        | 200    | 8     | 75       | 1            | 60.9             |
| BTO-23     | 2     | 0.25       | 200    | 12    | 0        | 4            | 87.9             |
| BTO-24     | 2.5/1 | 0          | 200    | 20    | 50       | 2            | 68.4             |
| BTO-25     | 0.5/1 | 1          | 200    | 24    | 100      | 5            | 82.3             |

\* Performance (%): Degradation rate of SMX in the presence of BTO samples and ultrasonic irradiation.

(Conditions: ultrasonic frequency: 45 kHz, ultrasonic power 300 W, reaction volume: 20 ml, initial SMX

concentration: 1 mg·L<sup>-1</sup>, BTO dosage: 0.05 g, and the reaction time is 12 min.)

**Table S3.** Variance analysis.

| Source    | *DOF | Adj SS | Adj MS | *F value | *F <sub>0.05</sub> |
|-----------|------|--------|--------|----------|--------------------|
| A         | 4    | 2298.2 | 574.55 | 3.13     | 2.49               |
| B         | 4    | 172    | 43.01  | 0.23     |                    |
| C         | 4    | 1135.4 | 283.84 | 1.55     |                    |
| D         | 4    | 292.9  | 73.23  | 0.4      |                    |
| E         | 4    | 2399.2 | 599.79 | 3.27     |                    |
| Deviation | 4    | 734.5  | 183.63 |          |                    |
| Sum       | 24   | 7032.2 |        |          |                    |

\*DOF: Degree of freedom.

\*F value: Significance of the influence of the factors.

\*F<sub>0.05</sub>: F<sub>0.05</sub> < 3.13 and 3.27. This indicated the significant influence of the addition amount of ethanol and the feed ratio.

**Table S4.** Mean response analysis.

| Factors        | A                   | B              | C              | D              | E                   | F     |
|----------------|---------------------|----------------|----------------|----------------|---------------------|-------|
| K <sub>1</sub> | 371                 | 336.8          | 403.4          | 304.1          | 370.9               | 335.8 |
| K <sub>2</sub> | 349.2               | 367.3          | 311.4          | 360.7          | 360.1               | 351.5 |
| K <sub>3</sub> | 345.7               | 360.1          | 358            | 389.7          | 367                 | 360.2 |
| K <sub>4</sub> | 345.7               | 371.2          | 356            | 355.7          | 331                 | 374.6 |
| K <sub>5</sub> | 359.8               | 356.1          | 362.7          | 381.3          | 362.5               | 369.4 |
| k <sub>1</sub> | 74.2                | 67.36          | 80.68          | 60.82          | 74.18               | 67.16 |
| k <sub>2</sub> | 69.84               | 73.46          | 62.28          | 72.14          | 72.02               | 70.3  |
| k <sub>3</sub> | 69.14               | 72.02          | 71.6           | 77.94          | 73.4                | 72.04 |
| k <sub>4</sub> | 69.14               | 74.24          | 71.2           | 71.14          | 66.2                | 74.92 |
| k <sub>5</sub> | 71.96               | 71.22          | 72.54          | 76.26          | 72.5                | 73.88 |
| R              | 5.06                | 6.88           | 18.4           | 17.12          | 7.98                | 7.76  |
| Rank           | 6                   | 5              | 1              | 2              | 3                   | 4     |
| Correlation    | negative & positive | positive       | positive       | positive       | negative & positive | -     |
| *Optimized BTO | A <sub>5</sub>      | B <sub>2</sub> | C <sub>5</sub> | D <sub>5</sub> | E <sub>5</sub>      |       |

\*Optimized BTO: The results of optimization process for preparing BTO with significant performance.

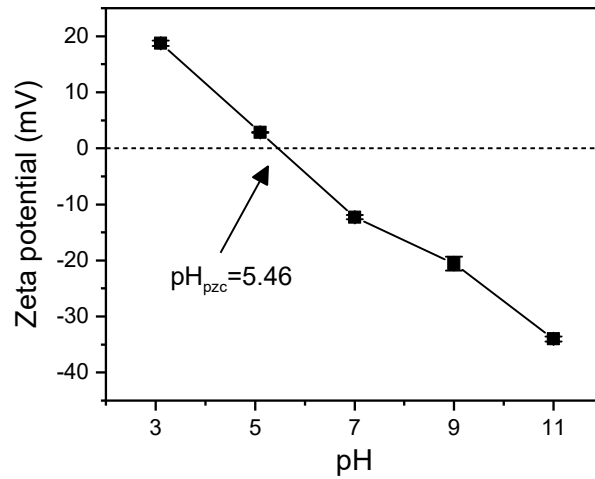

**Figure S1.** Zeta potential of BTO nanoparticles as a function of pH.

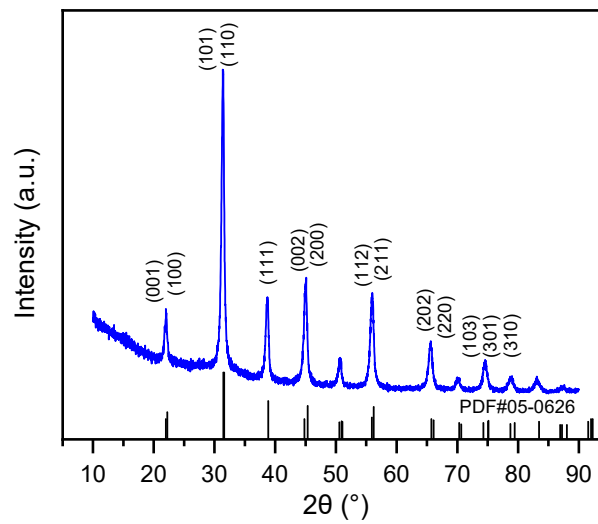

**Figure S2.** XRD patterns (the inserted lines correspond to the JCPDS data of No. 05-0626) of BTO nanoparticles after recycling experiments.

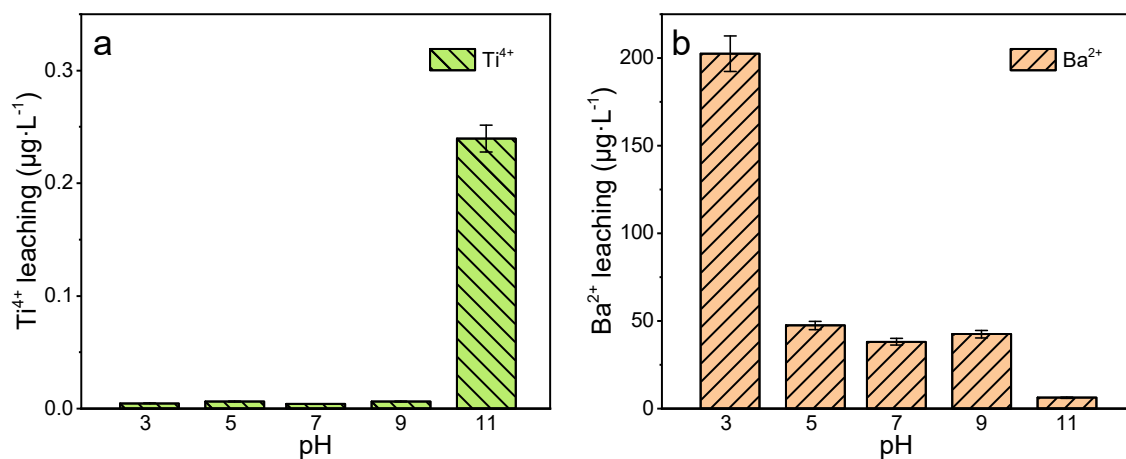

**Figure S3.** The leached concentration of Ti<sup>4+</sup> ions (a) and Ba<sup>2+</sup> ions (b) during the piezoelectric catalytic degradation of SMX. (Conditions: ultrasonic frequency: 45 kHz, ultrasonic power 300 W, reaction volume: 20 ml, initial SMX concentration: 1 mg·L<sup>-1</sup>, BTO dosage: 0.05 g, and the reaction time is 15 min.)

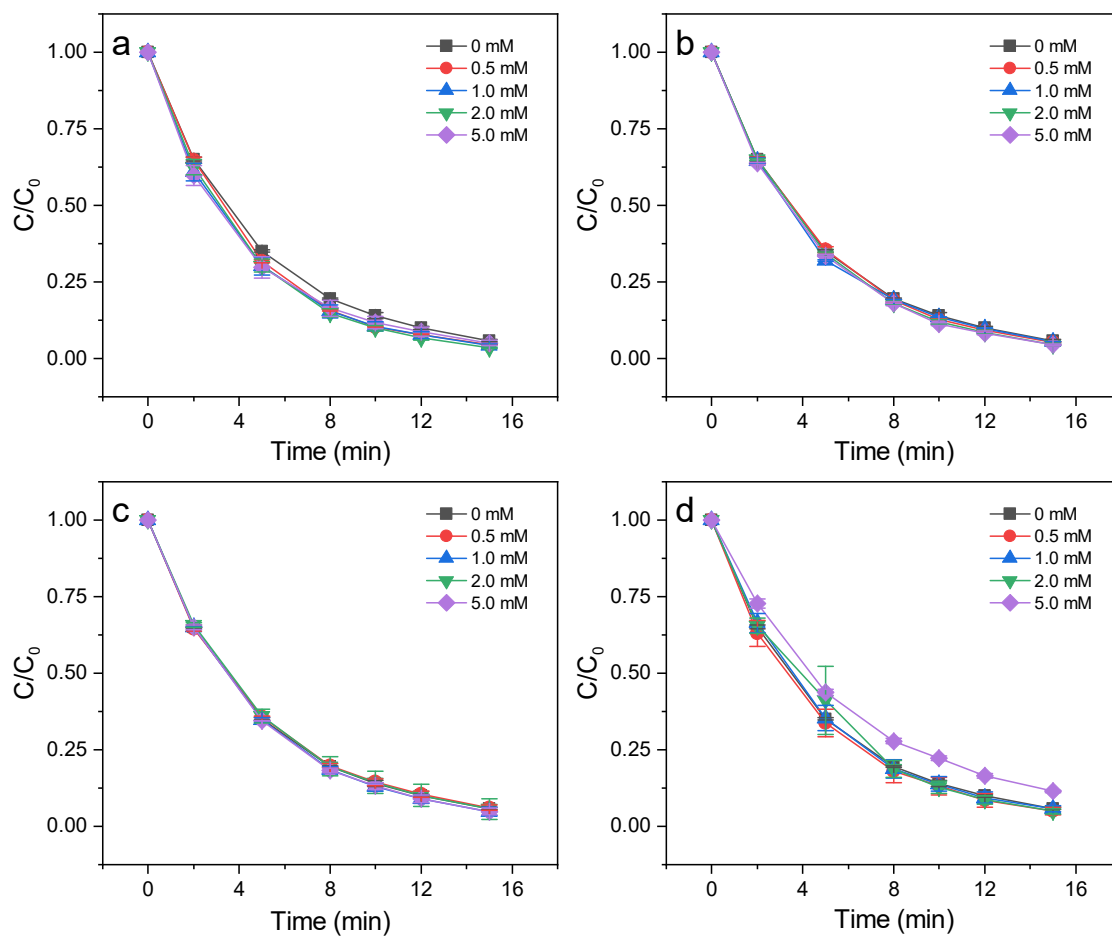

**Figure S4.** Effect of initial concentration of  $Cl^-$  (a), initial concentration of  $NO_3^-$  (b), initial concentration of  $Ca^{2+}$  (c), and initial concentration of  $Mg^{2+}$  (d) on the piezoelectric catalytic degradation of SMX as a function of reaction time. (Conditions: ultrasonic frequency: 45 kHz, ultrasonic power 300 W, reaction volume: 20 ml, initial SMX concentration:  $1 \text{ mg} \cdot \text{L}^{-1}$ , BTO dosage: 0.05 g.)
